# Supplementary material for: A method for increasing expressivity of Gene Ontology annotations using a compositional approach
Source: Springer Nature journal article supplement (doi:10.1186/1471-2105-15-155), 2014-05-21

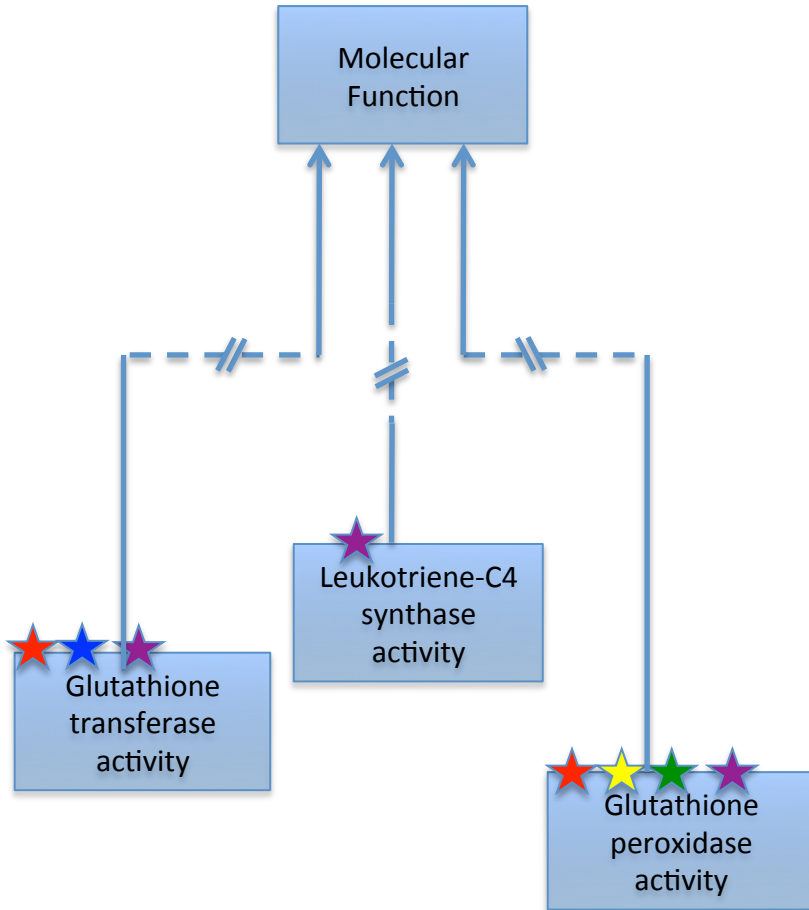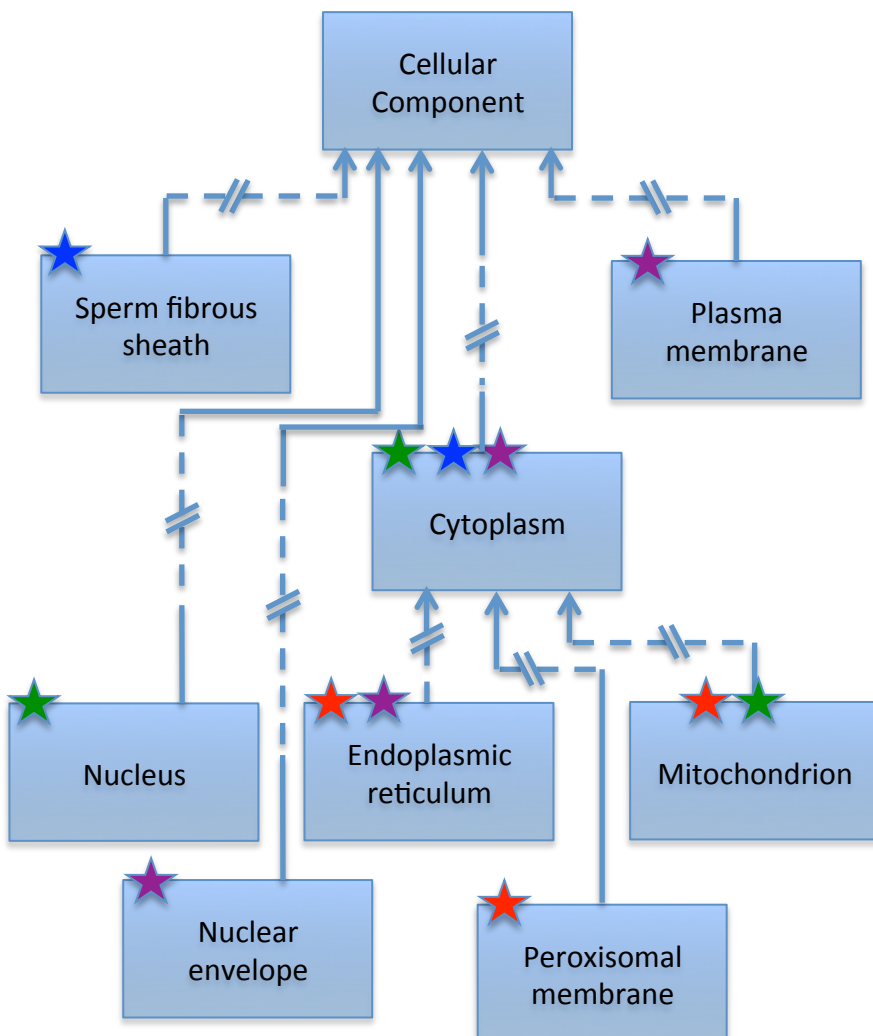

Supplement: 12859_2014_6429_MOESM1_ESM.pdf [file 12859_2014_6429_MOESM1_ESM.pdf]
