# Supplementary material for: A method for increasing expressivity of Gene Ontology annotations using a compositional approach
Source: Springer Nature journal article supplement (doi:10.1186/1471-2105-15-155), 2014-05-21
Supplement: 12859_2014_6429_MOESM2_ESM.pdf [file 12859_2014_6429_MOESM2_ESM.pdf]

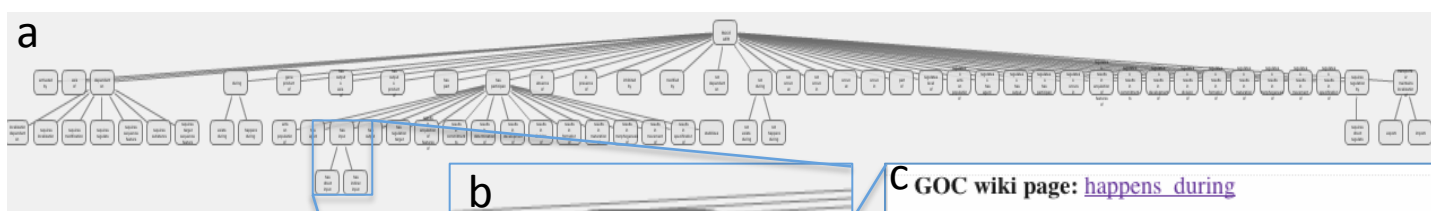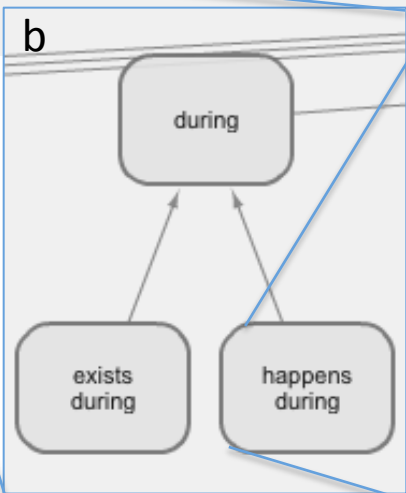

**c** **GOC wiki page:** [happens during](#)  
**GO Annotation Domain:** GO:0003674 (molecular\_function) or GO:0008150 (biological\_process)  
**GO Annotation Range:** GO:0003674 (molecular function) or GO:0008150 (biological process) or WBIs:0000075 (nematoda Life Stage) or ZFS:0100000 (null)  
**Usage:** Identifies a process or life stage during which a molecular function or biological process occurs  
**Subsets:**  
 GO:biological\_process  
 GO:molecular\_function  
 developmental\_stages
